1

2

**Shared roles of dorsal and subgenual  
anterior cingulate cortices in economic decisions**

3

4

5

6

Habiba Azab and Benjamin Y. Hayden

7

8

9

Department of Brain and Cognitive Sciences and Center for Visual Sciences,  
University of Rochester, Rochester, New York

10

11

12

\*Corresponding author:

13

Habiba Azab

14

Department of Brain and Cognitive Sciences

15

University of Rochester

16

Rochester NY 14618

17

Email address: hazab@ur.rochester.edu

18

19

20

## ABSTRACT

21

22

23

24

25

26

27

28

29

30

31

32

33

34

35

36

37

38

39

Theories of dorsal anterior cingulate cortex (dACC) function generally emphasize its cognitive and regulatory functions while theories of subgenual ACC (sgACC) emphasize its emotional, limbic, and arousal-related roles. But how different are these areas when compared in the same task? We recorded neuronal responses in both regions in macaques in a task with cognitive and limbic aspects, a token gambling task. Using tokens allowed us to compare responses to wins and losses. Both regions phasically encoded several important economic variables in similar ways; these included offered values, remembered values, attended values, and obtained values, and number of current tokens. Signal-to-noise ratio in sgACC was substantially lower than in dACC, and sgACC neurons responded more strongly to losses and in anticipation of large rewards. These results highlight the common economic functions of the anterior cingulum and suggest different functional emphases between regions, rather than a strict cognitive vs. emotional division.

40

## INTRODUCTION

41           The cingulum is a large structure on the medial wall encircling the corpus  
42 callosum in the saggital plane. The portion rostral to the central sulcus, the anterior  
43 cingulate cortex (ACC), is important for almost every aspect of cognition and its  
44 malfunction is associated with several psychiatric diseases (Bush et al., 1999;  
45 Heilbronner & Hayden, 2016; Paus, 2001; Rushworth et al., 2012; Shenhav et al., 2013).  
46 A great deal of evidence indicates that the ACC can be functionally subdivided into at  
47 least two portions, a dorsal (dACC) and subgenual (sgACC) one. These portions are  
48 associated with different cytoarchitectonics, connectivity patterns, patterns of  
49 hemodynamic activation, and lesion effects (Bush et al., 2000; Vogt et al., 1995).  
50 Nonetheless, a direct comparison of their function at the single-neuron level has never  
51 been made.

52           Theories of dACC generally emphasize its cognitive and regulatory roles rather  
53 than limbic and emotional ones. Cognitive functions associated with dACC include error-  
54 and conflict-monitoring, allocation of control, task-switching and regulation of strategy  
55 (Allman et al., 2001; Amiez et al., 2005; Carter et al., 2007; Kerns et al., 2004; Neubert et  
56 al., 2015; Procyk et al., 2000; Quilodran et al., 2008; Rushworth et al., 2002; Shenhav et  
57 al., 2013). In contrast, theories of sgACC emphasize its limbic, emotional, and arousal-  
58 related roles and not its cognitive function. These functions include emotional processing,  
59 mood-changes, sleep, and potentially a role in depression (Botteron et al., 2002; Coryell  
60 et al., 2005; Drevets et al., 1997; George et al., 2006; Johansen-Berg et al., 2008; Rolls et  
61 al., 2003). Some evidence suggests that these regions have negatively correlated activity  
62 patterns (Bush et al., 2000), consistent with the idea they inhibit each other. These

63 differences have led to the theory that these two regions play antagonistic roles in  
64 cognition (Bush et al., 2000).

65         Nonetheless, there are reasons to believe that dACC and sgACC play overlapping  
66 roles in cognition. Both are associated with monitoring and anticipation of reward (which  
67 itself has both cognitive and limbic aspects.) The role of the dorsal portion of ACC in  
68 reward representation is well-established (Heilbronner and Hayden, 2016). Although  
69 single-unit studies in the subgenual portion have been relatively few, some of these  
70 studies also implicate this region in reward processing and representation (Monosov &  
71 Hikosaka, 2012; Rudebeck et al., 2014; similar findings were reported in Amemori &  
72 Graybiel, 2012, who recorded in the adjacent pregenual cingulate). More broadly, both  
73 regions have been implicated in pain processing (Derbyshire et al., 1998; Vogt et al.,  
74 1992), depression (Cotter et al., 2001; Mayberg et al., 1997), addiction (Forman et al.,  
75 2004; Goldstein et al., 2007), OCD (Graybiel & Rauch, 2000), and other psychiatric  
76 disorders (Blumberg et al., 2000; Bouras et al., 2001; Drevets et al., 1997; Drevets et al.,  
77 2008; Ongur, Drevets & Price, 1998). Nonetheless, our ability to compare these regions  
78 is limited by the paucity of direct comparisons of their function.

79         Here we compared the responses of these two regions in a single gambling task.  
80 We sought to understand their relative contributions within a single task that was  
81 complex and engaging, and had both limbic and cognitive aspects. Among economic  
82 choice tasks, gambling is particularly useful because it is well-characterized  
83 mathematically, preferences are stable, and it involves both reward and  
84 monitoring/adjustment processes (Heilbronner and Hayden, 2013; Heilbronner &  
85 Hayden, 2015). Furthermore, we have a foundational understanding of the neuroscience

86 of risky choice, including recordings in dACC, although not in sgACC (Blanchard and  
87 Hayden, 2014; Hayden et al., 2011; Hosokawa et al., 2013; Kennerley et al., 2009;  
88 Procyk et al., 2000). To directly compare coding of gain and loss, we added a new feature  
89 to our task. On each trial, monkeys gambled for gain or loss of tokens; collection of 6  
90 tokens produced a jackpot reward (cf. Seo & Lee, 2007). This feature allowed for direct  
91 comparison of two reward signs in a single modality (thus controlling for sensory  
92 features that, say, an air puff or hypertonic solution would not). This manipulation also  
93 allowed us to explore responses to secondary reinforcers—which has not been done in  
94 sgACC.

95       These two cingulate regions exhibited strikingly similar patterns of activity in our  
96 study. Both encoded several economic variables and did so in similar ways. Specifically,  
97 we found encoding of the values of offers (attended and remembered), outcomes, and  
98 number of tokens accumulated. Both regions used an attentionally-aligned, as opposed to  
99 labeled line, coding scheme for values. We also confirmed earlier results showing  
100 encoding of positions of offered and chosen options (Strait et al., 2016). We found no  
101 measurable differences in response latency. This is not to say the regions were identical:  
102 two major differences stood out. First, task-relevant coding was more frequent in dACC  
103 and signal-to-noise was roughly three times greater. Second, neurons in dACC were  
104 biased towards higher firing for gamble wins, while neurons in sgACC were biased  
105 towards higher firing for losses. There was also a positive bias at the single neuron level  
106 in anticipation of large, primary rewards in sgACC; no corresponding bias occurred in  
107 dACC. These data suggest that dACC and sgACC play overlapping roles in economic

108 decisions albeit with different emphases, but do not have antagonistic roles or strong  
109 cognitive / emotional specialization.

110

111

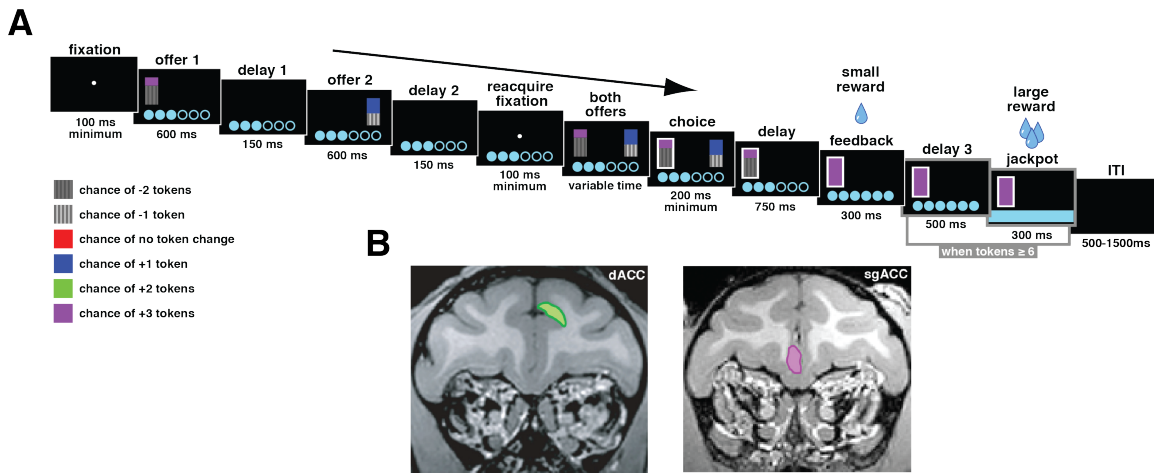

112

113 **Figure 1: A:** Example trial from token-gambling task. Offers were presented  
114 asynchronously, and the side the first offer appeared on was counterbalanced across  
115 trials. Each gamble offered one of two outcomes (indicated by the colors of the bars) at a  
116 certain probability (indicated by their heights). **B:** Regions of interest (for exact  
117 coordinates, see Methods).

118

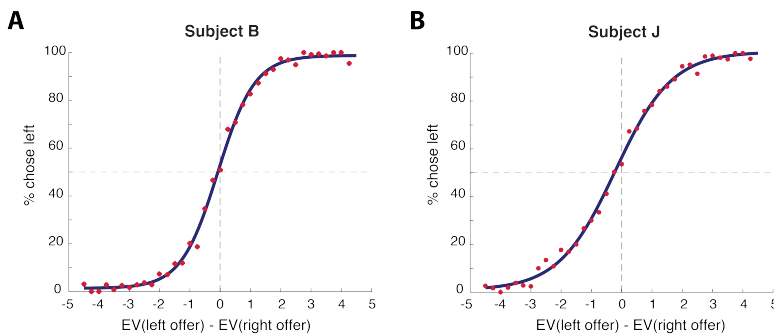

119

120 **Figure 2:** Behavior for each subject, fit to a sigmoid function. Subjects choose the left  
121 option more often as its value increases. EV: expected value of gamble.

122

123

124

## RESULTS

### Behavior

126 Two monkeys performed a token-gambling task. On each trial, monkeys chose  
127 between two options presented asynchronously that differed in three dimensions: win  
128 amount, loss amount, and probability of win (Figure 1A). Both monkeys showed  
129 behavior consistent with task understanding (Figure 2). Specifically, both subjects  
130 preferred the option with the greater expected value (subject B: 80.3%; subject J: 75.1%;  
131 both  $P < 0.0001$ ; two-sided binomial test), and were sensitive to the three parameters that  
132 defined each gamble (See Table 1). Subjects were more sensitive to win amount than to  
133 loss amount, consistent with the idea that they focus on the win (Hayden & Platt, 2007;  
134 Hayden et al., 2008). Monkeys showed weak side and order biases (rightward choice:  
135 51.0% in subject B; 47.4% in subject J; chose second: 52.5% in subject B; 55.6% in  
136 subject J.)

137 Monkeys were risk-seeking, consistent with earlier studies (Hayden et al., 2008;  
138 Hayden & Platt, 2007; McCoy & Platt, 2005). To assess risk-seeking, we fit a utility  
139 curve distortion parameter to subjects' behavior in each session (Lak et al., 2014;  
140 Yamada et al., 2013). This parameter,  $\alpha$ , was always greater than 1 in both subjects (B:  $\alpha$   
141 = 1.61 ( $n = 66$  sessions); subject J: 1.81 ( $n = 74$  sessions); both greater than 1 at  $P <$   
142 0.0001; one-sample t-test over sessions). Subjects' behavior was modestly influenced by  
143 the number of current tokens: accuracy improved as tokens increased (subject B:  $\beta =$   
144 0.027,  $P = 0.0012$ ; subject J:  $\beta = 0.078$ ,  $P < 0.0001$ ; logistic regression of accuracy  
145 against tokens acquired).

146

| Regressor                        | Subject B            | Subject J            |
|----------------------------------|----------------------|----------------------|
| Win amount, left offer           | 1.2302 (P < 0.0001)  | 1.0097 (P < 0.0001)  |
| Loss amount, left offer          | 0.4063 (P < 0.0001)  | 0.2451 (P < 0.0001)  |
| Probability of win, left offer   | 3.3828 (P < 0.0001)  | 3.1745 (P < 0.0001)  |
| Win amount, right offer          | -1.1577 (P < 0.0001) | -1.1390 (P < 0.0001) |
| Loss amount, right offer         | -0.3449 (P < 0.0001) | -0.1937 (P < 0.0001) |
| Probability of loss, right-offer | -4.1934 (P < 0.0001) | -3.5026 (P < 0.0001) |
| Intercept                        | -0.2893 (P < 0.0001) | 0.6177 (P < 0.0001)  |

147 **Table 1:** Regression coefficients from a logistic regression model of choice (left = 1,  
148 right = 0) against the variables in the regressor column. A 'loss' within a gamble was  
149 always less than or equal to the win outcome of that gamble. Note that losses included  
150 negative outcomes. Overall, the expected value of the win-portion of a gamble influenced  
151 behavior more than the value of a loss did in both subjects.  
152

### 153 Variance explained by task variables is higher in dACC than in sgACC

154 Responses to task variables were attenuated in sgACC neurons compared to  
155 dACC neurons. To quantify this difference, we regressed average firing rate in a sliding  
156 500 ms window against eight task-relevant variables (see Methods). We then computed  
157 the average fraction of variance in firing rates explained by this model for each neuron in  
158 each brain region over the entire trial. We next compared these measures across regions,  
159 where neurons were the unit of analysis. Task-relevant variables explained over three  
160 times as much variance in dACC than in sgACC neurons (average adjusted  $R^2$  over all  
161 neurons: dACC: 0.0093; sgACC: 0.0025;  $T = 4.94$ ,  $P < 0.0001$ ; two-sample t-test). Thus,  
162 variance explained was between 3 and 4 times greater in dACC than in sgACC.

163

164

165



166

| Variable                   | dACC (t-statistic)       | sgACC (t-statistic)         |
|----------------------------|--------------------------|-----------------------------|
| Offer 1 value (attended)   | 0.64 (P = 0.53)          | 1.67 (P = 0.098)            |
| Offer 1 value (remembered) | -0.26 (P = 0.79)         | -0.47 (P = 0.64)            |
| Offer 2 value (attended)   | 0.95 (P = 0.34)          | 0.97 (P = 0.33)             |
| Chosen value               | -1.47 (P = 0.14)         | <b>-2.31 (P = 0.022)</b>    |
| Unchosen value             | <b>2.70 (P = 0.0078)</b> | 1.73 (P = 0.085)            |
| Outcome                    | <b>2.35 (P = 0.02)</b>   | <b>-2.85 (P = 0.0050)</b>   |
| Number of tokens           | 1.42 (P = 0.16)          | 0.15 (P = 0.88)             |
| Jackpot                    | 0.092 (P = 0.93)         | <b>4.47 (P &lt; 0.0001)</b> |

167 **Table 2:** Assessment of biases in tuning in the overall population. We performed this  
 168 analysis running a one-sample t-test on the regression coefficients corresponding to each  
 169 variable obtained from a multiple linear regression (see Methods).  
 170

| Variable                   | dACC (% positive)                   | sgACC (% positive)          |
|----------------------------|-------------------------------------|-----------------------------|
| Offer 1 value (attended)   | 57.6% (n = 19/33, P = 0.49)         | 66.7% (n = 12/18, P = 0.24) |
| Offer 1 value (remembered) | 56.0% (n = 14/25, P = 0.69)         | 41.7% (n = 5/12, P = 0.77)  |
| Offer 2 value (attended)   | 50.0% (n = 9/18, P = 1)             | 57.1% (n = 8/14, P = 0.79)  |
| Chosen value               | <b>20% (n = 4/20, P = 0.012)</b>    | 22.2% (n = 2/9, P = 0.18)   |
| Unchosen value             | <b>100% (n = 12/12, P = 0.0005)</b> | 50.0% (n = 3/6, P = 1.0)    |
| Outcome                    | <b>71.0% (n = 22/36, P = 0.029)</b> | 31.6% (n = 6/19, P = 0.17)  |
| Number of tokens           | 60.0% (n = 27/49, P = 0.23)         | 58.3% (n = 14/31, P = 0.54) |
| Jackpot                    | 54.3% (n = 19/35, P = 0.74)         | 70.6% (n = 12/17, P = 0.14) |

171 **Table 3:** Assessment of biases in frequency of coding in the tuned population. We  
 172 determine whether the fraction of positively tuned neurons (of the tuned population only)  
 173 is significantly larger than chance (50%), using a two-sided binomial test.  
 174

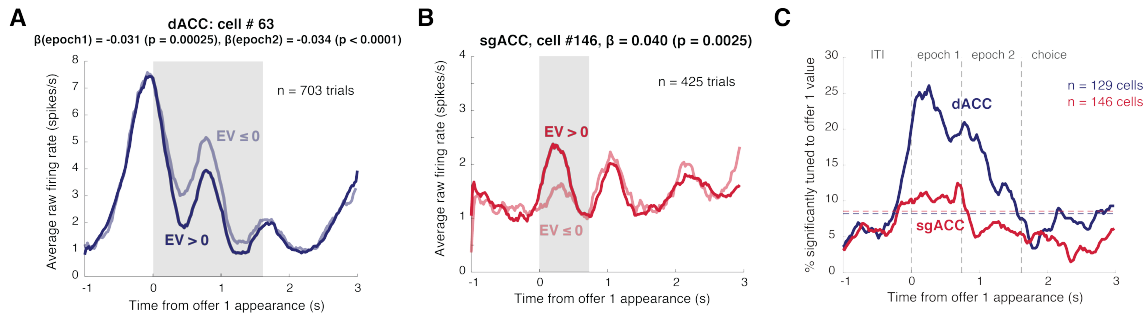

175

176 **Figure 3:** Neural responses to the value of offer 1. **A:** Responses of one dACC neuron  
177 with increasing firing rate in response to smaller values of offer 1 in both the first and  
178 second epochs. Shaded regions are epochs of interest with significant modulation. **B:**  
179 Responses of one sgACC neuron with increasing firing rates in response to larger values  
180 of offer 1 in the first epoch. **C:** Proportion of neurons selective for the value of offer 1 in  
181 both regions throughout the course of the trial. This fraction was computed by regressing  
182 firing rate over a 500 ms sliding window against the expected value of the first offer,  
183 along with other task-relevant variables (see Methods). The blue and red horizontal lines  
184 indicate the percentage of neurons we would expect to see by chance (as determined by a  
185 two-sided binomial test, according to the number of neurons in each area) for dACC and  
186 sgACC, respectively.

187

### 188 Neurons in both regions encode offered values

189 Responses of two neurons (one in dACC and one in sgACC) are shown in Figure  
190 3. Both of these neurons' firing rates were correlated with the expected value of the first  
191 offer while it was displayed on the screen (epoch 1). The firing rate of the dACC neuron  
192 was also affected by the expected value of the first offer when the second offer appeared  
193 (epoch 2). This was not the case for the sgACC neuron.

194 Significant proportions of neurons in both regions encoded the value of the first  
195 offer in the 500 ms epoch starting 100 ms after that offer appeared. Note that we chose  
196 this epoch for another study and use it here to allow comparability across datasets (Strait  
197 et al., 2014; Strait et al., 2015).

198 We found that responses of 25.6% ( $n = 33/129$ ) of neurons in dACC and 12.3% ( $n$   
199  $= 18/146$ ) in sgACC were affected by the value of offer 1 during epoch 1. Both  
200 proportions are greater than chance (dACC:  $P < 0.0001$ ; sgACC:  $P = 0.0004$ ; two-sided  
201 binomial test). Figure 3C shows the fraction of neurons whose firing rates were  
202 modulated by offer 1 value through time. There was no measured bias towards a positive  
203 direction in either area (see Table 3). The average regression weight across all neurons,  
204 another measure of directionality of effect, was not different from zero in either area,  
205 indicating no bias in the overall populations (see Table 2).

206

### 207 **Neurons in both regions integrate gamble probability and stakes**

208 The mathematical expected value of a gamble in our task – and its subjective  
209 value – depend on three factors: the probability of the win, the win amount, and the loss  
210 amount. We wanted to know whether the individual components of a gamble are  
211 integrated into a single general value signal, or represented as separate attributes.

212 We explored whether probability and stakes were integrated in the first epoch of  
213 the trial, when only the first gamble had been displayed. We compared regression  
214 weights for neuronal responses to the first offer against the magnitude and probability of  
215 a win and the magnitude of loss, in one multivariate regression, while controlling for  
216 other variables that significantly explained firing rate for this neuron in this epoch (see  
217 Methods for further detail).

218 Regression coefficients corresponding to win-magnitude and win-probability  
219 were positively correlated, supporting the hypothesis that these parameters are integrated  
220 This correlation is observed in both cingulate regions (dACC:  $r = 0.63$ ,  $P < 0.0001$ ;

221 sgACC:  $r = 0.31$ ,  $P = 0.0001$ ; Pearson correlation coefficient of signed regression  
222 coefficients). The absolute values of these coefficients were also positively correlated,  
223 indicating that these variables were encoded by a single population of neurons rather than  
224 two distinct ones — further supporting the integration hypothesis (dACC:  $r = 0.59$ ,  $P <$   
225  $0.0001$ ; sgACC:  $r = 0.56$ ,  $P < 0.0001$ ). We previously reported similar findings in the  
226 ventromedial prefrontal cortex (vmPFC) and the ventral striatum (VS, Strait et al., 2015).  
227 These results suggest that all four regions carry integrated value signals.

228 Win and loss magnitudes were also integrated in both areas (dACC:  $r = 0.34$ ,  $P =$   
229  $0.0001$ ; sgACC:  $r = 0.36$ ,  $P < 0.0001$ ; Pearson correlation coefficient of signed regression  
230 coefficients). While these variables were represented in overlapping populations in  
231 sgACC ( $r = 0.30$ ,  $P = 0.0003$ ; Pearson correlation coefficient of unsigned regression  
232 coefficients), this relationship does not achieve significance in dACC ( $r = 0.17$ ,  $P =$   
233  $0.053$ ).

234

### 235 **Neurons in both regions encode remembered values**

236 We examined whether firing rates reflected the value of the first offer while the  
237 second offer was presented (epoch 2, 500 ms epoch starting 100 ms after the second offer  
238 appeared,). We saw encoding of offer 1 in this epoch in dACC (19.4% of neurons,  $n =$   
239  $25/129$ ,  $P < 0.0001$ ; two-sided binomial test), but it failed to reach significance in sgACC  
240 (8.22%,  $n = 12/146$ ,  $P = 0.084$ ). Since task-relevant signals were generally attenuated in  
241 sgACC, and the percentage of tuned neurons we saw failed to reach significance by one  
242 neuron, we repeated this analysis in an earlier 500 ms epoch, starting immediately when  
243 the second offer appeared. The fraction of neurons tuned to the value of offer 1 in this

244 epoch does achieve significance (11.0%,  $n = 16/146$ ,  $P = 0.0028$ ; two-sided binomial  
245 test). This proportion is still significant when correcting for multiple comparisons (i.e. at  
246  $P < 0.025$ ). This finding suggests that sgACC may, in fact, carry a memory signal,  
247 although one that is more attenuated and less reliable than that in dACC. There was no  
248 bias in tuning in either brain region (see Table 3), nor was there any bias in the regression  
249 coefficients of the overall populations (see Table 2).

250         We next investigated the relationship between the pattern of tuning for attended  
251 and remembered offers. Was offer 1 encoded in similar tuning formats as it moved from  
252 the retina to working memory? And were the putative working memory neurons, which  
253 carried the value of offer 1 in the second epoch, the same ones that encoded it when it  
254 was first presented—in the first epoch? The answers to both questions is yes for dACC,  
255 but we cannot draw conclusions from our results in sgACC. We computed regression  
256 weights for the expected value of offer 1 in epoch 1 (when it was present on the screen)  
257 and for the same option in epoch 2 (when it was remembered), while controlling for other  
258 task variables that best explained each neuron's response (see Methods). These values  
259 were positively correlated in dACC ( $r = 0.32$ ,  $P = 0.0002$ ; Pearson correlation coefficient  
260 of signed regression coefficients), indicating a preservation of coding format as  
261 information was transferred from an active to a remembered storage buffer. The absolute  
262 regression coefficients were also positively correlated ( $r = 0.44$ ,  $P < 0.0001$ ), suggesting  
263 these variables were encoded by a single task-sensitive population, rather than memory  
264 and active-buffer neurons (consistent with vmPFC and VS; Strait et al., 2015).

265         We cannot draw any strong conclusions from results in sgACC. There was no  
266 significant correlation between these variables: neither one indicating preservation of

267 format ( $r = 0.090$ ,  $P = 0.28$ ; Pearson correlation of signed regression coefficients), nor  
268 one indicating that this signal was carried by the same population ( $r = 0.0380$ ,  $P = 0.65$ ;  
269 Pearson correlation of unsigned regression coefficients). Results were similar in the  
270 slightly earlier 500 ms epoch we used earlier (preservation of format:  $r = 0.15$ ,  $P = 0.079$ ;  
271 overlapping populations:  $r = 0.063$ ,  $P = 0.45$ ). It is difficult to draw conclusions from the  
272 absence of this correlation, as it could be due to weaker signal-to-noise ratio in this  
273 region. We therefore performed a cross-validation procedure similar to that in Blanchard  
274 et al. (2015), and found that our signal in the epochs of interest was not strong enough to  
275 detect correlations (see Methods). The failure of this procedure suggests that we could  
276 not detect this effect with our data, even if it existed. We therefore draw no conclusions  
277 from this null result.

278

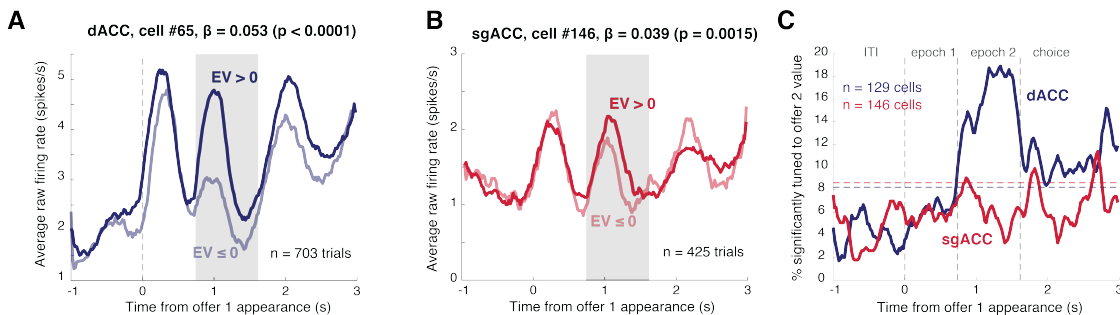

279

280 **Figure 4:** *Neural responses to the value of offer 2. A:* Responses of one dACC neuron  
281 whose firing rate increased in response to larger values of offer 2. **B:** Responses of one  
282 sgACC neuron whose firing rate increased in response to larger values of offer 2. **C:**  
283 Percentage of neurons tuned to the value of the second offer in both regions over the  
284 course of the trial. A 500 ms sliding window was used to compute these values at each  
285 point of the trial. The blue and red horizontal lines indicate the percentage of neurons we  
286 would expect to see tuned by chance (as determined by a two-sided binomial test,  
287 according to the number of neurons in each area) for dACC and sgACC, respectively.

288

289

## 290 **Simultaneous encoding of both offer values**

291 We next explored the effects of the second offer value on firing rates during  
292 epoch 2. Figure 4 shows two example neurons, one from dACC and one from sgACC,  
293 whose firing rates increased in response to the second offer. A significant proportion of  
294 neurons in both regions encoded the value of the second offer when it appeared (dACC:  
295 14.0%,  $n = 18/129$ ; sgACC: 9.59%,  $n = 14/146$ ). Both proportions exceed what we would  
296 predict by chance (dACC:  $P = 0.0001$ ; sgACC:  $P = 0.016$ ; two-sided binomial test).  
297 There was no significant bias in tuning in either area (Table 3), and the average  
298 coefficient of offer 2 value over the entire population was also not biased in either brain  
299 region (Table 2). Figure 4C shows how the fraction of neurons responsive to offer 2  
300 changed over the course of the trial.

301

## 302 **Attentionally-aligned coding scheme for offer values**

303 Do cingulate regions encode all attended offers similarly, using the same  
304 population? Our previous studies of vmPFC and VS indicate that value coding in these  
305 regions is attentionally-aligned – that is, they encode the value of the attended offer in a  
306 conserved attended format (by format, we mean tuning strength and sign, and identity of  
307 neurons; Strait et al., 2015; Akaishi & Hayden, 2016; Rich & Wallis, 2016).). This  
308 framework differs from a labeled-line format, in which a specialized set of neurons  
309 encodes the value of each offer respectively (e.g. Hunt et al., 2015). To test this, we  
310 compared the regression coefficients associated with the first offer in the first epoch to  
311 those associated with the second offer in the second epoch.

312 Our data support the attentional alignment hypothesis. Specifically, coding  
313 direction for both offers was consistent in both areas (dACC:  $r = 0.51$ ,  $P < 0.0001$ ;  
314 sgACC:  $r = 0.26$ ,  $P = 0.0013$ ; Pearson correlation test of signed coefficients). Second,  
315 both regions made use of a consistent set of neurons for the two offers (dACC:  $r = 0.45$ ,  $P$   
316  $< 0.0001$ ; sgACC:  $r = 0.32$ ,  $P = 0.0001$ ; Pearson correlation test of unsigned coefficients).  
317

318 **Beta anti-correlation in dACC: a putative signature of comparison through mutual**  
319 **inhibition**

320 One putative neural signature of the comparative process is an anti-correlation  
321 between regression coefficients for the values of the two offers while they are being  
322 compared (Strait et al., 2014). This anti-correlation indicates that the two offers modulate  
323 neuronal activity in opposing directions, and that the ensemble of neurons effectively  
324 subtracts their values. We observed this pattern in dACC during the second epoch—when  
325 both offers had been presented ( $r = -0.17$ ,  $P = 0.050$ ; Pearson correlation coefficient of  
326 signed regression coefficients), suggesting that this area is involved in comparing the two  
327 offers. We found no significant correlation in sgACC ( $r = -0.077$ ,  $P = 0.35$ ). It is difficult  
328 to interpret the lack of a significant correlation as the absence of a comparison signal in  
329 light of our weak signal-to-noise ratio, and due to the failure of the cross-validation  
330 procedure (see Methods).  
331



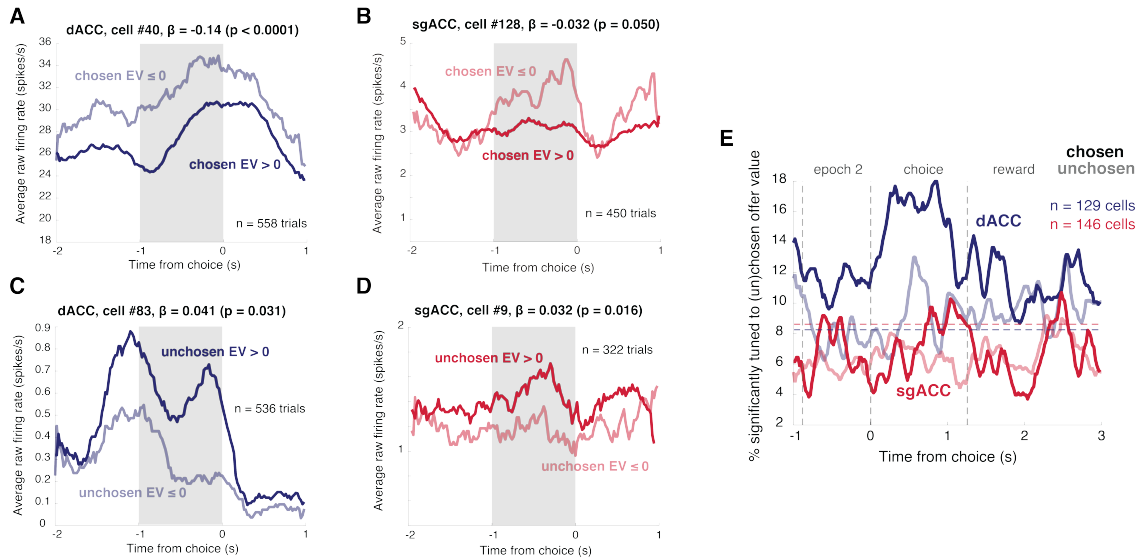

332

333 **Figure 5:** Neural responses to the values of the chosen and unchosen offers. **A:**  
334 Responses of dACC neuron whose firing rate was negatively modulated by the value of  
335 the chosen offer. This pattern is typical of neurons in this region (see text and Tables 2  
336 and 3). **B:** Responses of sgACC neuron whose firing rate was negatively modulated by  
337 the value of the chosen offer. **C:** Responses of dACC neuron whose firing rate was  
338 positively modulated by the value of the unchosen offer. This pattern is typical of neurons  
339 in this region (see text and Tables 2 and 3). **D:** Responses of sgACC neuron whose firing  
340 rate was positively modulated by the value of the unchosen offer. **E:** Percentage of  
341 neurons tuned to the values of the chosen and unchosen offer values in both cingulate  
342 regions throughout the course of the trial. Percentages were computed using a 500 ms  
343 sliding window, using a regression analysis (see Methods for details). The blue and red  
344 horizontal lines indicate the percentage of neurons we would expect to see tuned by  
345 chance (as determined by a two-sided binomial test, according to the number of neurons  
346 in each area) for dACC and sgACC, respectively.

347

### 348 Encoding of chosen and unchosen value signals in both regions

349 We examined selectivity for chosen and unchosen offer values in the 1-second  
350 epoch ending with the saccade that indicated the subject's choice. We chose this epoch to  
351 capture any correlates of the choice process that arose when the second offer was  
352 presented (presumably when the comparison was made), and when the subject had to  
353 indicate his choice.

354 Figure 5 shows four neurons whose firing rates were affected by the values of the  
355 chosen and unchosen offer values in both brain regions. Significant proportions of such  
356 neurons were found in dACC, but not in sgACC. 15.5% ( $n = 20/129$ ) of dACC responded  
357 to the chosen value (two-sided binomial test:  $P < 0.0001$ ), and 9.30% ( $n = 12/129$ )  
358 responded to the unchosen value ( $P = 0.030$ ). The proportion of neurons encoding chosen  
359 value was greater than the proportion encoding unchosen value ( $P = 0.018$ ; two-sided  
360 binomial test). However, encoding of chosen value was not stronger than encoding of  
361 unchosen value when the tuning coefficients of all neurons in the population were  
362 compared ( $T = 1.67$ ,  $P = 0.097$ ; unpaired two-sample t-test of absolute regression  
363 coefficients). There was more overlap than expected by chance between these  
364 populations ( $r = 0.22$ ,  $P = 0.013$ ; Pearson correlation of unsigned regression coefficients).  
365 Figure 5E shows the change in these fractions as the choice was made.

366 There was a bias towards negative tuning for the chosen value in the tuned  
367 population ( $n = 16/20$  negatively tuned,  $P = 0.012$ ; two-sided binomial test), but not in  
368 the regression coefficients of the overall population (Table 2). We found a bias towards  
369 positive tuning for the unchosen value: both in the tuned population ( $n = 12/12$  positively  
370 tuned;  $P = 0.0005$ ; two-sided binomial test), and in the overall population ( $T = 2.70$ ,  $P =$   
371  $0.0078$ ; one-sample t-test).

372 No significant proportion of neurons encoding chosen (6.16%,  $n = 9/146$ ,  $P =$   
373  $0.57$ ; two-sided binomial test) or unchosen (4.11%,  $n = 6/146$ ,  $P = 0.71$ ) offer values was  
374 found in sgACC. However, the overall population was negatively biased towards  
375 encoding of the chosen value ( $T = -2.31$ ,  $P = 0.022$ ; one-sample t-test), and exhibited a

376 positive trend in encoding the unchosen value (Table 2), echoing the patterns we see in  
377 dACC, albeit attenuated.

378

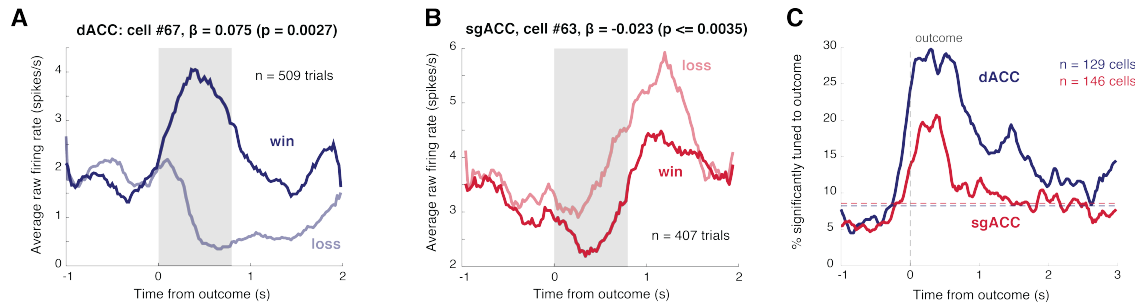

379

380 **Figure 6:** *Neural responses to outcomes in both regions. A:* Responses of dACC neuron  
381 with increasing firing rate in response to wins. There was a bias towards this pattern in  
382 the dACC population (see text and Table 2). **B:** sgACC neuron with increasing firing rate  
383 in response to losses. There was a bias towards this pattern in the sgACC population (see  
384 text and Table 2). **C:** Percentage of neurons in both regions tuned to the outcome of a  
385 trial throughout the course of a trial, using a 500 ms sliding window. The blue and red  
386 horizontal lines indicate the percentage of neurons we would expect to see tuned by  
387 chance (as determined by a two-sided binomial test, according to the number of neurons  
388 in each area) for dACC and sgACC, respectively.

389

### 390 Encoding of gamble outcomes

391 We examined selectivity for gamble outcomes during the 800 ms reward epoch  
392 that began with the reveal of the outcome and extended into the intertrial interval (see  
393 Figure 1). Recall that outcomes in this task were tokens, not juice rewards. Figure 6  
394 shows responses of two example neurons, one from each region, selective for outcome  
395 amount. We excluded jackpot trials from this analysis so that liquid reward was matched  
396 in all cases; the only difference was tokens given or taken. 24.03% (n = 31/129) of  
397 neurons in dACC and 13.0% (n = 19/146) of neurons in sgACC encoded the outcome of  
398 a trial. Both of these proportions are significant (P < 0.0001 in dACC and P = 0.0001 in  
399 sgACC; two-sided binomial test). Figure 6C shows the peak of these fractions in the

400 outcome epoch. These are the first demonstration of sgACC selectivity to gains or losses  
401 of secondary reinforcers.

402 Neurons in dACC showed a positive bias in outcome encoding. Specifically, the  
403 majority of tuned neurons were positively tuned for outcome (71.0% positively tuned,  $n =$   
404 22/36,  $P = 0.029$ ; two-sided binomial test). There was also a positive bias in regression  
405 coefficients in the overall population ( $T = 2.35$ ,  $P = 0.02$ ; one-sample t-test). In sgACC,  
406 neurons in the overall population were negatively tuned to outcomes ( $T = -2.85$ ,  $P =$   
407 0.0050; one-sample t-test), although this bias in the overall population's regression  
408 weights was not significant in the tuned population (Table 3).

409

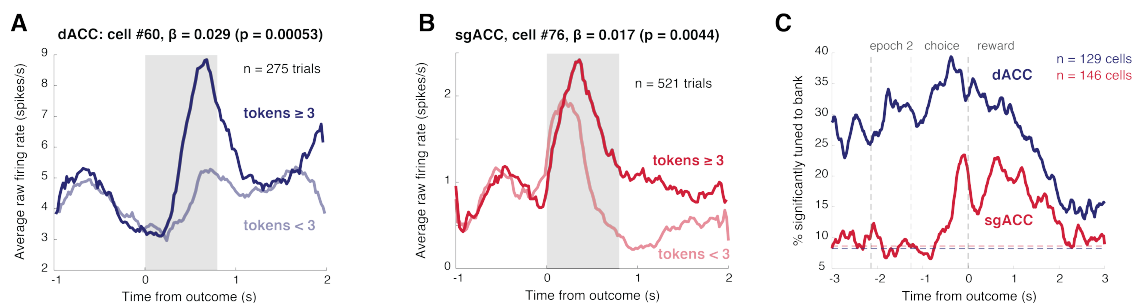

410

411 **Figure 7:** Neural responses to the number of tokens accumulated at the beginning of the  
412 trial. **A:** Responses of dACC neuron that increased its firing rate as subjects accumulated  
413 more tokens. **B:** Responses of sgACC neuron that increased its firing rate as subjects  
414 accumulated more tokens. **C:** Percentage of neurons in each area tuned to the number of  
415 tokens accumulated throughout the course of the trial. All percentages were computed  
416 using a 500 ms window (see Methods). The blue and red lines indicate the percentage of  
417 neurons we would expect to see tuned by chance (as determined by a two-sided binomial  
418 test, according to the number of neurons in each area) for dACC and sgACC,  
419 respectively.

420

#### 421 **Both regions encode current number of tokens**

422 In our task, the number of tokens provided a measure of progress towards the  
423 jackpot reward. As noted, performance improved modestly with number of tokens. We

424 hypothesized that this variable would affect neuronal responses in both cingulate areas.  
425 Figure 7 shows two neurons (one in dACC, the other in sgACC) whose responses were  
426 modulated by the number of tokens acquired during the 800 ms reward epoch. 34.9% (n  
427 = 45/129) in dACC and 16.4% in sgACC (n = 24/146) significantly represented this  
428 variable in that epoch. Both of these fractions are significant ( $P < 0.0001$  in both regions;  
429 two-sided binomial test). Figure 7C shows the change in this fraction throughout the trial.  
430 There was no bias in tuning in either brain region: neither within the tuned population  
431 (Table 3), nor in the overall population's regression coefficients (Table 2).  
432

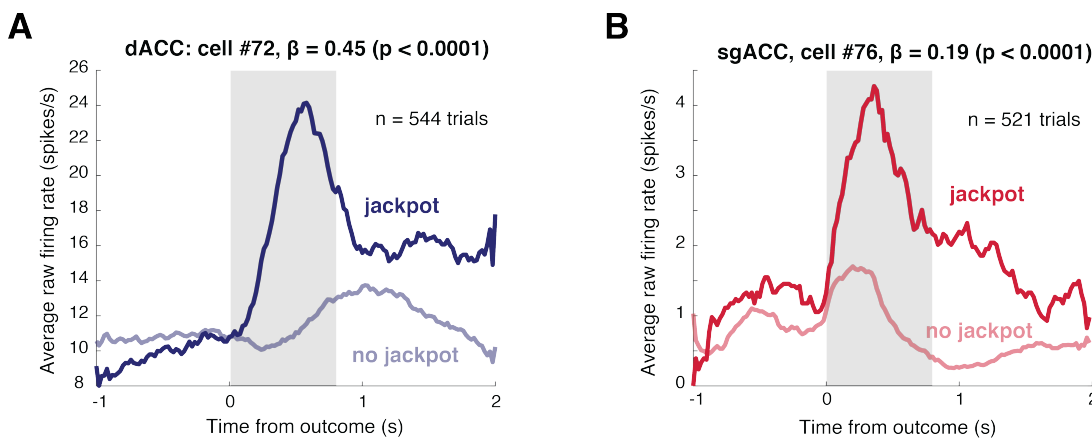

433

434 **Figure 8:** Neural responses to the anticipation of a large liquid reward (jackpot). **A:**  
435 Responses of dACC neuron with increasing firing rate before jackpot rewards. **B:**  
436 Responses of sgACC neuron with increasing firing rate before jackpot rewards. There  
437 was a bias towards this response profile in the sgACC population (see text and Table 2).  
438

### 439 Neurons in both regions carry reward anticipation signals

440 We quantified neural responses to anticipation of jackpots by comparing them to  
441 responses on standard trials. Figure 8 shows two example neurons—one from each  
442 region—with activity that varied with anticipation of a jackpot reward. Significant  
443 proportions of such neurons were found in both regions (27.3% in dACC, n = 35/129,  $P <$

444 0.0001; 11.6% in sgACC,  $n = 17/146$ ,  $P = 0.0011$ ; two-sided binomial test). We saw no  
445 bias in positive or negative tuning in dACC: neither in the tuned population (Table 3), nor  
446 in the population overall (Table 2). However, there was a positive bias in sgACC in the  
447 overall population ( $T = 4.47$ ,  $P < 0.0001$ ; one-sample t-test), although not significantly in  
448 the tuned population (Table 3).

449

#### 450 **Neurons in both regions carry spatial signals**

451 We previously showed coding for two task variables, spatial position of offer and  
452 chosen option, in both dACC and sgACC (Strait et al., 2016). The sgACC data used in  
453 that study ( $n = 112$  neurons) were augmented with additional neurons collected in the  
454 same animals in the same task ( $n = 34$  additional neurons; total of 146 neurons). We still  
455 find these effects in the larger dataset. (Note that for consistency with the other analyses  
456 in this manuscript, we used a *multiple* linear regression analysis, see Methods).  
457 Specifically, sgACC encoded the position of the offer during the first offer epoch ( $n =$   
458  $14/146$  neurons,  $P = 0.016$ ; two-sided binomial test), and the position of the chosen  
459 option during the post-choice epoch ( $n = 20/146$  neurons,  $P < 0.0001$ ). Results remained  
460 qualitatively similar in dACC with our new analyses. We see a significant proportion of  
461 neurons tuned to the side of the first offer in the first epoch ( $n = 20/129$  neurons,  $P <$   
462  $0.0001$ ), and to the side of the chosen offer in the post-choice epoch ( $n = 30/129$  neurons,  
463  $P < 0.0001$ ).

464

465

466

467 **No significant difference in latency of encoding chosen side between regions**

468 We investigated latency differences between dACC and sgACC. We were  
469 particularly interested in encoding of the chosen side, since this variable defined the  
470 action ultimately taken to indicate the subject's decision. Conventional latency analyses  
471 may be confounded due to the difference in signal-to-noise ratio between regions. This  
472 problem is especially acute when these differences are large, as they are in our sgACC  
473 and dACC datasets. In our data, signals are likely to achieve significance sooner in  
474 dACC, simply because they are stronger than in sgACC.

475 To avoid this confound, we developed a new procedure to control for signal-to-  
476 noise differences. We added Poisson distributed noise to our dACC dataset (mean =  
477 mean firing rate of each cell), and tested the proportion of variance explained in this new  
478 whitened dataset. If signal-to-noise in the reward epoch (when both regions were most  
479 responsive) was within 1.5% of that in sgACC, we included this dataset in our analyses.  
480 We generated 500 datasets in this manner, then performed a latency analysis the same as  
481 in Strait et al. (2015), with the slight modification that we used a multiple regression  
482 model instead of a t-test to determine when neurons first responded significantly to  
483 chosen side (this analysis takes into account neuronal responses to other variables, and is  
484 therefore more robust). We used this manipulation to account for the variance explained  
485 by other task-variables (listed in Methods). Even using this more sensitive measure and  
486 better-controlled analysis, we failed to see a significant difference between latencies  
487 across regions (t-test across regions significant for 1/500 datasets,  $P = 0.998$ ).

488

489

490

## DISCUSSION

491 We examined responses of neurons in two cingulate regions, dACC and sgACC,  
492 in a token gambling task. Both areas encoded several task variables, including values of  
493 attended and remembered offers, outcomes, current token number, and, confirming an  
494 earlier study, position of offered and chosen options. Neuronal response latencies were  
495 similar in both areas. We observed two major differences between the regions: first, the  
496 task-related signal-to-noise was consistently greater in dACC than in sgACC. Second, we  
497 observed some differences in the average direction of value tuning: sgACC shows a  
498 negative bias to outcomes while dACC shows a positive one, and, prior to jackpots,  
499 sgACC shows a positive bias in activation, while dACC shows no consistent pattern.  
500 Overall, these results point to a broad functional overlap between dACC and sgACC,  
501 with differences more in emphasis than in major functional role.

502 Studies of functional neuroanatomy often focus on identifying each area's unique  
503 specialization, but there are other important questions about brain regions—such as:  
504 which regions subserve a given brain function? One mental operation may be  
505 implemented by similar computations occurring simultaneously in multiple brain areas  
506 (Behrmann & Plaut, 2013; Cisek & Kalaska, 2010; Cisek, 2012; Farah, 1994; McClelland  
507 & Rumelhart, 1986). Our data suggest that risky economic choice may be mediated by  
508 computations occurring in both dACC and sgACC, and, given our earlier data, across  
509 vmPFC and VS as well (Strait et al., 2014; Strait et al., 2015). While these regions may,  
510 in principle, compute similar variables for distinct purposes, it is more parsimonious to  
511 assume, without strong evidence to the contrary, that they play similar roles.



512 By way of analogy, an earlier generation of scholars proposed that early and mid-  
513 level visual areas are specialized for specific aspects of form (Zeki, 1978), and that V4 is  
514 specialized for color (Essen & Zeki, 1978; Zeki, 1977; Zeki, 1980). Subsequent work  
515 disproved this idea and demonstrated that its role in color processing is not very different  
516 from those of adjacent areas (Schein et al., 1982; Motter, 1994; Van Essen & Maunsell,  
517 1983). Its properties are similar to (but slightly more complex than) its afferent V2 and  
518 similar to (but slightly less complex than) its efferent PIT (Desimone & Schein, 1987;  
519 Desimone et al., 1985; Desimone & Duncan, 1995; Hayden & Gallant, 2013; Mirabella et  
520 al., 2007). It would be a mistake to look for color vision in any one brain region: it  
521 depends on the distributed and coordinated action of several brain regions, all of which  
522 perform many other computations unrelated to color (Desimone & Duncan, 1995;  
523 Lennie, 1998). We suspect that the same principles apply to economic choice; it reflects  
524 qualitatively similar, although quantitatively different, repeated simple computations  
525 occurring in parallel across multiple prefrontal and striatal regions (and possibly others as  
526 well). These results thus argue against a strong functional dichotomy between the two  
527 regions. For example, Bush et al. (2000) argue that the dorsal cognitive region is  
528 functionally distinct from the subgenual affective region and they may even inhibit each  
529 other. We see no evidence for a cognitive/limbic split, nor of mutual inhibition between  
530 these two regions. Clearly, other studies, using other methods, do see evidence for such a  
531 split; further work will be required to reconcile these contradictions.

532 At the same time, the differences we observe between dACC and sgACC argue  
533 against a mass action view of brain function. The differences we see are consistent with  
534 results of both neuroimaging and lesion studies supporting some functional difference

535 between the areas, and with the neuroanatomy, which shows different patterns of  
536 connectivity (Heilbronner & Haber, 2014 Vogt et al., 1995). The difference in signal-to-  
537 noise is particularly intriguing. It may reflect a greater selectivity for choice tasks in the  
538 dorsal region; presumably there are other tasks that would drive sgACC more effectively  
539 than dACC (however, we would expect these differences to be quantitative, not  
540 qualitative). Another possibility is that economic decision-making, while distributed, has  
541 a fan-in structure and that dACC, which is presumably later in the hierarchy, has a more  
542 concentrated and thus stronger set of task signals.

543         Our findings generally confirm and extend the existing literature on sgACC.  
544 Monosov & Hikosaka (2012), like us, find a bias towards encoding of negative outcomes  
545 in area 25. We show that this finding extends to secondary (token) reinforcers. They  
546 report no encoding of probability, and thus of integrated value; our finding of integrated  
547 value encoding thus suggests that sgACC may play a more direct economic role,  
548 especially in decision-making tasks. Amemori & Graybiel (2012) recorded in pregenual  
549 cingulum, in a region that is rostral to our region, but has a small overlap (see Methods).  
550 They found a subzone, which may overlap with our subgenual recording site, biased  
551 towards negative encodings. Our high fraction of subgenual neurons encoding upcoming  
552 large rewards (jackpots) provide confirmation for the idea, proposed by Rudebeck and  
553 colleagues (2014), that sgACC serves to sustain autonomic arousal in anticipation of a  
554 reward. The phasic, task-relevant signals in sgACC, and its direct role in reward-  
555 processing and anticipation, suggest that the role for subgenual neurons extends beyond  
556 the control of basic arousal functions like sleep (Rolls et al., 2003). Our findings also  
557 cohere with the findings relating activity in sgACC to negative affect and depression.

558 Overactivity in this region correlates with depressive symptoms (Drevets, 2002; Mayberg  
559 et al., 2000) and with transient sadness in healthy subjects (Mayberg et al., 1999); chronic  
560 stimulation of sgACC can alleviate the symptoms of depression (Mayberg et al., 2005).  
561 Negative mood inducing stimuli tend to activate sgACC (George et al., 1995; Mayberg et  
562 al., 1997; Mayberg et al., 1999), and structural abnormalities in sgACC correlate with  
563 mood disorders (Botteron et al., 2002; Coryell et al., 2005; Drevets et al., 1997).

564         These findings also have implications for our understanding of dACC as well.  
565 The role of dACC in economic choice remains disputed. Some research indicates that it  
566 serves as the site of choice (Rangel & Hare, 2010); our work confirms this idea but, in the  
567 broader context of data from other studies, suggests it does not play a unique role. Other  
568 research suggests that dACC plays a specifically post-decisional role, in part because it  
569 preferentially encodes the value of unchosen options (Blanchard & Hayden, 2014;  
570 Boorman et al., 2011; Rushworth et al., 2012; Hayden et al., 2009). Our results here  
571 suggest that dACC may encode predecisional variables: the values of both chosen and  
572 unchosen options – at least before the decision is made. Other work links dACC to  
573 persistence – that is, in maintenance of value encoding until the time of reward to allow  
574 stable behavior (Hillman & Bilkey, 2013, Chudasama et al., 2013; Picton et al., 2007;  
575 Blanchard et al., 2015; Shidara and Richmond, 2002). While we did not use a persistence  
576 task, our results do endorse the idea that dACC serves to encode prospective rewards,  
577 suggesting that it does serve this function although not necessarily purely for the purpose  
578 of persistence.

579         Overall, these results invite speculation on whether one can ascribe a single  
580 integrated role for the cingulum (Hayden & Platt, 2009). On one hand, the broad overlap

581 between dACC and sgACC that we see suggests it may have a general economic role. On  
582 the other, our findings in a similar task in vmPFC and VS suggest this role may not be  
583 unique to the cingulate cortex (Strait et al., 2014; Strait et al., 2015). Our results also have  
584 some similarity to findings from the posterior cingulate cortex. Neural responses in that  
585 region are associated with several economic variables, including offer and outcome  
586 variables, as well as learning and control variables (Dean & Platt, 2003; Hayden et al,  
587 2009; Heilbronner & Platt, 2013; McCoy et al., 2003; Heilbronner et al., 2011). Neurons  
588 in sgACC tend to have poorer signal-to-noise than dACC, much like neurons in PCC  
589 (Hayden et al., 2008), suggesting they may have some affinity. Still, we consider the  
590 question of whether there is a general and unique function for the cingulum to be  
591 unanswered.

592

593

#### **ACKNOWLEDGEMENTS**

594 We thank Caleb Strait for assistance designing the task, Tommy Blanchard, and  
595 Alex Thomé for useful discussions, and Meghan Castagno, Giuliana Loconte and Marc  
596 Mancarella for assistance in data collection. This research was supported by a NIH R01  
597 (DA037229) and a NSF CAREER award to BYH.

598

599

600

601

602

603

604

## **MATERIALS AND METHODS**

605           Some of the data for both dACC and sgACC recordings were published (Strait et  
606 al., 2016); all analyses presented here are new.

607

### **Surgical Procedures**

609           All procedures were approved by the University Committee on Animal Resources  
610 at the University of Rochester and were designed and conducted in compliance with the  
611 Public Health Service's Guide for the Care and Use of Animals. Two male rhesus  
612 macaques (*Macaca mulatta*: subject B age 5y. 7mo.; subject J age 6y. 7mo.) served as  
613 subjects. A small prosthesis for holding the head was used. Animals were habituated to  
614 laboratory conditions and then trained to perform oculomotor tasks for liquid reward. A  
615 Cilux recording chamber (Crist Instruments) was placed over the dACC. Position was  
616 verified by magnetic resonance imaging with the aid of a Brainsight system (Rogue  
617 Research Inc.). Animals received appropriate analgesics and antibiotics after all  
618 procedures. Throughout both behavioral and physiological recording sessions, the  
619 chamber was kept sterile with regular antibiotic washes and sealed with sterile caps. All  
620 recordings were performed during the animals' light cycle between 8am and 5pm.

621

### **Recording Site**

623           We approached dACC through a standard recording grid (Crist Instruments). We  
624 defined dACC according to the Paxinos atlas (Paxinos et al., 2000). Roughly, we  
625 recorded from a ROI lying within the coronal planes situated between 29.50 and 34.50  
626 mm rostral to interaural plane, the horizontal planes situated between 4.12 to 7.52 mm

627 from the brain's dorsal surface, and the sagittal planes between 0 and 5.24 mm from  
628 medial wall. Our recordings were made from a central region within this zone. We  
629 confirmed recording location before each recording session using our Brainsight system  
630 with structural magnetic resonance images taken before the experiment. Neuroimaging  
631 was performed at the Rochester Center for Brain Imaging, on a Siemens 3T  
632 MAGNETOM Trio Tim using 0.5 mm voxels. We confirmed recording locations by  
633 listening for characteristic sounds of white and gray matter during recording, which in all  
634 cases matched the loci indicated by the Brainsight system.

635 We approached sgACC using similar equipment, in a similar manner. We defined  
636 sgACC as lying within the coronal planes situated between 24 and 36 mm rostral to  
637 interaural plane, the horizontal planes situated between 17.33 to 25.12 mm from the  
638 brain's dorsal surface, and the sagittal planes between 0 and 5.38 mm from the medial  
639 wall. Our recordings were made from a central region within this zone. We again confirm  
640 recording locations using structural magnetic resonance images, Brainsight, and listening  
641 to characteristic sounds of white and gray matter. These regions correspond to area 25 as  
642 identified by Paxinos (n = 118 neurons) and also to the most caudal portion of area 32 (n  
643 = 28 neurons).

644

#### 645 **Electrophysiological Techniques**

646 Single electrodes (Frederick Haer & Co., impedance range 0.8 to 4 MU) were  
647 lowered using a microdrive (NAN Instruments) until waveforms of between one and  
648 three neuron(s) were isolated. Individual action potentials were isolated on a Plexon  
649 system (Plexon, Inc.). Neurons were selected for study solely on the basis of the quality

650 of isolation; we never pre-selected based on task-related response properties. All  
651 collected neurons for which we managed to obtain at least 250 trials were analyzed.

652

### 653 **Eye Tracking and Reward Delivery**

654 Eye position was sampled at 1,000 Hz by an infrared eye-monitoring camera  
655 system (SR Research). Stimuli were controlled by a computer running Matlab  
656 (Mathworks) with Psychtoolbox (Brainard, 1997) and Eyelink Toolbox (Cornelissen et  
657 al., 2002). Visual stimuli were colored rectangles on a computer monitor placed 57 cm  
658 from the animal and centered on its eyes (Figure 1A). A standard solenoid valve  
659 controlled the duration of juice delivery. The relationship between solenoid open time  
660 and juice volume was established and confirmed before, during, and after recording.

661

### 662 **Behavioral Task**

663 Monkeys performed a two-option gambling task. The task was similar to one we  
664 have used previously (Strait et al., 2014; Strait et al., 2015), with two major differences:  
665 (1) monkeys gambled for virtual tokens—rather than liquid—rewards, and (2) outcomes  
666 could be losses as well as wins.

667 Two offers were presented on each trial. Each offer was represented by a rectangle 300  
668 pixels tall and 80 pixels wide ( $11.35^\circ$  of visual angle tall and  $4.08^\circ$  of visual angle wide).  
669 20% of options were safe (100% probability of either 0 or 1 token), while the remaining  
670 80% were gambles. Safe offers were entirely red (0 tokens) or blue (1 token). The size of  
671 each portion indicated the probability of the respective reward. Each gamble rectangle  
672 was divided horizontally into a top and bottom portion, each colored according to the

673 token reward offered. Gamble offers were thus defined by three parameters: two possible  
674 token outcomes, and probability of the top outcome (the probability of the bottom was  
675 strictly determined by the probability of the top). The top outcome was 10%, 30%, 50%,  
676 70% or 90% likely.

677 Six initially unfilled circles arranged horizontally at the bottom of the screen  
678 indicated the number of tokens to be collected before the subject obtained a liquid  
679 reward. These circles were filled appropriately at the end of each trial, according to the  
680 outcome of that trial. When 6 or more tokens were collected, the tokens were covered  
681 with a solid rectangle while a liquid reward was delivered. Tokens beyond 6 did not carry  
682 over, nor could number of tokens fall below zero.

683 On each trial, one offer appeared on the left side of the screen and the other  
684 appeared on the right. Offers were separated from the fixation point by 550 pixels (27.53°  
685 of visual angle). The side of the first offer (left and right) was randomized by trial. Each  
686 offer appeared for 600 ms and was followed by a 150 ms blank period. Monkeys were  
687 free to fixate upon the offers when they appeared (and in our observations almost always  
688 did so). After the offers were presented separately, a central fixation spot appeared and  
689 the monkey fixated on it for 100 ms. Following this, both offers appeared simultaneously  
690 and the animal indicated its choice by shifting gaze to its preferred offer and maintaining  
691 fixation on it for 200 ms. Failure to maintain gaze for 200 ms did not lead to the end of  
692 the trial, but instead returned the monkey to a choice state; thus, monkeys were free to  
693 change their mind if they did so within 200 ms (although in our observations, they  
694 seldom did so). A successful 200 ms fixation was followed by a 750 ms delay, after  
695 which the gamble was resolved and a small reward (100  $\mu$ L) was delivered—regardless



696 of the outcome of the gamble—to sustain motivation. This small reward was delivered  
697 within a 300 ms window. If 6 tokens were collected, a delay of 500 ms was followed by a  
698 large liquid reward (300  $\mu$ L) within a 300 ms window, followed by a random inter-trial  
699 interval (ITI) between 0.5 and 1.5 s. If 6 tokens were not collected, subjects proceeded  
700 immediately to the ITI.

701 Each gamble included at least one positive or zero-outcome, ensuring that every  
702 gamble carried the possibility of a win. This decreased the number of trivial choices  
703 presented to subjects, and maintained motivation.

704

## 705 **Statistical Methods**

706 **PSTHs** were constructed by aligning spike rasters to the task event of interest  
707 (offer 1 appearance, choice or feedback) and averaging firing rates across multiple trials.  
708 Firing rates were calculated in 20 ms bins but were generally analyzed in longer (500-  
709 1000 ms) epochs. Plots were generated in Matlab, and use the Matlab function *smooth*  
710 with a smoothing factor of 20.

711 Firing rates were **normalized** by subtracting the mean and dividing by the  
712 standard deviation of the entire neuron's psth.

713 We test for significant tuning and assess variance explained using a **multiple**  
714 **linear regression**, including the following task-relevant variables: expected value of  
715 offers 1 and 2, the number of tokens collected as of the beginning of the trial, the side the  
716 first offer appeared on, conflict between offer values (defined as the absolute difference  
717 between them), the side of the chosen offer, the outcome of the trial (in tokens), and the  
718 probability of that outcome (a measure of surprise).

719           **Analysis epochs** were chosen *a priori*, before data analysis began, to reduce the  
720 likelihood of p-hacking. The first and second offer epochs were defined as the 500 ms  
721 epoch beginning 100 ms after the offer was presented, to account for information  
722 processing time. The choice epoch was the 1-second epoch before choice was indicated  
723 using an express saccade. The reward epoch was defined as the 800 ms epoch following  
724 the resolution of a gamble: this was when feedback and a small liquid reward were given  
725 (regardless of trial outcome), followed by a 500 ms delay (this was part or all of the  
726 intertrial interval on non-jackpot trials, and a pre-jackpot delay on jackpot trials).

727           All **fractions of tuned neurons** were tested for significance using a two-sided  
728 binomial test. All binomial tests throughout the manuscript were two-sided.

729           All **sliding window plots** use a sliding 500 ms window, computing the fraction of  
730 tuned neurons in the population every 20 ms. Points on the plot are aligned to the start of  
731 this window. Significance is assessed using a multiple linear regression including all  
732 task-variables (mentioned above). Plots were smoothed using the Matlab function *smooth*  
733 and a smoothing factor of 20.

734           We use **beta correlation analyses using stepwise regression** to assess whether  
735 neurons represent two variables (or the same variable at different time periods) using  
736 similar / orthogonal / opposing formats, in overlapping / orthogonal / distinct populations.  
737 In these analyses, we first find the regression coefficients associated with the variables in  
738 question, then find the Pearson correlation coefficient between these.

739           We noticed that, depending on which variables we included in the regression, the  
740 results of our beta correlation analyses sometimes differed. We therefore used a stepwise  
741 regression model as an objective method of determining which variables should be

742 included in the final regression for each individual neuron. We first include all relevant  
743 task variables, including the variables of interest, in this stepwise regression. We then  
744 perform a (non-stepwise) multiple linear regression analysis again using only the  
745 variables obtained from the previous step, as well as the variables of interest. We do this  
746 to obtain a regression coefficient corresponding to the variable of interest for each  
747 neuron, regardless of whether the coefficient for this variable achieved significance in the  
748 previous step.

749         The Pearson correlation coefficient between signed regression coefficients  
750 indicate whether variables were represented in a similar *format* i.e. directionality of  
751 tuning across the population. A positive correlation indicates a preservation of  
752 directionality, while a negative correlation indicates variables were represented in  
753 opposing directionality of firing rate modulation. No correlation suggests orthogonal  
754 formats, but we draw no strong conclusions from these.

755         Similarly, the Pearson correlation coefficient between unsigned regression  
756 coefficients indicates whether similar neuronal populations tended to be involved in  
757 encoding the two variables in question. A positive correlation indicates overlapping  
758 populations, while a negative correlation indicates separate ones. A lack of correlation  
759 suggests orthogonal populations (i.e. encoding one variable does not affect a neuron's  
760 likelihood of encoding the other variable), but we again draw no strong conclusions from  
761 this null result.

762         We performed a **cross-validation procedure** similar to that in Blanchard et al.  
763 (Blanchard et al., 2015) on our sgACC dataset to determine whether our signal in the first  
764 and second epochs was strong enough to detect correlations. We split trials into two

765 random sets (even and odd), and computed the regression coefficients for each individual  
766 neuron in response to offer 1 value in both epochs 1 and 2. We then obtained the Pearson  
767 correlation coefficient of these signed regression coefficients within each epoch. We see  
768 no correlation in the epoch we analyzed for offer 1 memory signals (i.e. epoch 2:  $r =$   
769  $0.16$ ,  $P = 0.058$ , Pearson correlation coefficient). The failure of this cross-validation  
770 procedure to detect a significant correlation in sgACC indicates that we did not have  
771 sufficient signal in our dataset to detect correlation effects, even if they existed. This  
772 procedure prevents us from drawing strong conclusions regarding the *absence* of a signal  
773 in this region.  
774  
775

776

## REFERENCES

777 Akaishi, R., & Hayden, B. Y. (2016). A Spotlight on Reward. *Neuron*, 90(6), 1148–1150.

778 <http://doi.org/10.1016/j.neuron.2016.06.008>

779 Allman, J. M., Hakeem, A., Erwin, J. M., Nimchinsky, E., & Hof, P. (2001). The

780 Anterior Cingulate Cortex. *Annals of the New York Academy of Sciences*, 935(1),

781 107–117. <http://doi.org/10.1111/j.1749-6632.2001.tb03476.x>

782 Amemori, K. I., & Graybiel, A. M. (2012). Localized microstimulation of primate

783 pregenual cingulate cortex induces negative decision-making. *Nature*

784 *neuroscience*, 15(5), 776–785.

785 Amiez, C., Joseph, J.-P., & Procyk, E. (2005). Anterior cingulate error-related activity is

786 modulated by predicted reward. *European Journal of Neuroscience*, 21(12), 3447–

787 3452. <http://doi.org/10.1111/j.1460-9568.2005.04170.x>

788 Behrmann, M., & Plaut, D. C. (2013). Distributed circuits, not circumscribed centers,

789 mediate visual recognition. *Trends in Cognitive Sciences*, 17(5), 210–219.

790 <http://doi.org/10.1016/j.tics.2013.03.007>

791 Blanchard, T. C., & Hayden, B. Y. (2014). Neurons in Dorsal Anterior Cingulate Cortex

792 Signal Postdecisional Variables in a Foraging Task. *Journal of Neuroscience*,

793 34(2), 646–655. <http://doi.org/10.1523/JNEUROSCI.3151-13.2014>

794 Blanchard, T. C., Hayden, B. Y., & Bromberg-Martin, E. S. (2015). Orbitofrontal Cortex

795 Uses Distinct Codes for Different Choice Attributes in Decisions Motivated by

796 Curiosity. *Neuron*, 85(3), 602–614. <http://doi.org/10.1016/j.neuron.2014.12.050>

797 Blanchard, T. C., Strait, C. E., & Hayden, B. Y. (2015). Ramping ensemble activity in

798 dorsal anterior cingulate neurons during persistent commitment to a decision.

799 *Journal of Neurophysiology*, 114(4), 2439–2449.

800 <http://doi.org/10.1152/jn.00711.2015>

801 Blumberg, H. P., Stern, E., Martinez, D., Ricketts, S., De Asis, J., White, T., ... &

802 Silbersweig, D. A. (2000). Increased anterior cingulate and caudate activity in

803 bipolar mania. *Biological psychiatry*, 48(11), 1045–1052.

804 Boorman ED, Behrens TE, Rushworth MF (2011) Counterfactual choice and learning in

805 a neural network centered on human lateral frontopolar cortex. *PLoS Biol*

806 9:e1001093. CrossRef Medline

- 807 Botteron, K. N., Raichle, M. E., Drevets, W. C., Heath, A. C., & Todd, R. D. (2002).  
808 Volumetric reduction in left subgenual prefrontal cortex in early onset depression.  
809 *Biological Psychiatry*, 51(4), 342–344. [http://doi.org/10.1016/S0006-](http://doi.org/10.1016/S0006-3223(01)01280-X)  
810 [3223\(01\)01280-X](http://doi.org/10.1016/S0006-3223(01)01280-X)
- 811 Bouras, C., Kövari, E., Hof, P. R., Riederer, B. M., & Giannakopoulos, P. (2001).  
812 Anterior cingulate cortex pathology in schizophrenia and bipolar disorder. *Acta*  
813 *Neuropathologica*, 102(4), 373–379. <http://doi.org/10.1007/s004010100392>
- 814 Bush, G., Frazier, J. A., Rauch, S. L., Seidman, L. J., Whalen, P. J., Jenike, M. A., et al.  
815 (1999). Anterior cingulate cortex dysfunction in attention-deficit/hyperactivity  
816 disorder revealed by fMRI and the counting stroop. *Biological Psychiatry*, 45(12),  
817 1542–1552. [http://doi.org/10.1016/S0006-3223\(99\)00083-9](http://doi.org/10.1016/S0006-3223(99)00083-9)
- 818 Bush, G., Luu, P., & Posner, M. I. (2000). Cognitive and emotional influences in anterior  
819 cingulate cortex. *Trends in Cognitive Sciences*, 4(6), 215–222.  
820 [http://doi.org/10.1016/S1364-6613\(00\)01483-2](http://doi.org/10.1016/S1364-6613(00)01483-2)
- 821 Bush, G., Vogt, B. A., Holmes, J., Dale, A. M., Greve, D., Jenike, M. A., & Rosen, B. R.  
822 (2002). Dorsal anterior cingulate cortex: a role in reward-based decision making.  
823 *Proceedings of the National Academy of Sciences*, 99(1), 523–528.  
824 <http://doi.org/10.1073/pnas.012470999>
- 825 Carter, C. S., & van Veen, V. (2007). Anterior cingulate cortex and conflict detection: An  
826 update of theory and data. *Cognitive, Affective, & Behavioral Neuroscience*, 7(4),  
827 367–379. <http://doi.org/10.3758/CABN.7.4.367>
- 828 [Chudasama, Y., Daniels, T. E., Gorrin, D. P., Rhodes, S. E., Rudebeck, P. H., & Murray,](#)  
829 [E. A. \(2013\). The role of the anterior cingulate cortex in choices based on reward](#)  
830 [value and reward contingency. \*Cerebral Cortex\*, 23\(12\), 2884-2898.](#)
- 831 Cisek, P. (2012). Making decisions through a distributed consensus. *Current Opinion in*  
832 *Neurobiology*, 22(6), 927–936. <http://doi.org/10.1016/j.conb.2012.05.007>
- 833 Cisek, P., & Kalaska, J. F. (2010). Neural Mechanisms for Interacting with a World Full  
834 of Action Choices. *Dx.Doi.org*, 33(1), 269–298.  
835 <http://doi.org/10.1146/annurev.neuro.051508.135409>
- 836 Coryell, W., Nopoulos, P., Drevets, W., Wilson, T., & Andreasen, N. C. (2005).  
837 Subgenual Prefrontal Cortex Volumes in Major Depressive Disorder and

- 838 Schizophrenia: Diagnostic Specificity and Prognostic Implications. *American*  
839 *Journal of Psychiatry*, 162(9), 1706–1712.  
840 <http://doi.org/10.1176/appi.ajp.162.9.1706>
- 841 Cotter, D., Mackay, D., Landau, S., Kerwin, R., & Everall, I. (2001). Reduced Glial Cell  
842 Density and Neuronal Size in the Anterior Cingulate Cortex in Major Depressive  
843 Disorder. *Archives of General Psychiatry*, 58(6), 545–553.  
844 <http://doi.org/10.1001/archpsyc.58.6.545>
- 845 Dean, H. L., & Platt, M. L. (2003). Spatial representations in posterior cingulate cortex.  
846 *Journal of Vision*, 3(9), 427–427. <http://doi.org/10.1167/3.9.427>
- 847 Derbyshire, S. W. G., Vogt, B. A., & Jones, A. K. P. (1998). Pain and Stroop interference  
848 tasks activate separate processing modules in anterior cingulate cortex.  
849 *Experimental Brain Research*, 118(1), 52–60.  
850 <http://doi.org/10.1007/s002210050254>
- 851 Desimone, R., & Duncan, J. (1995). Neural mechanisms of selective visual attention.  
852 *Annual Review of Neuroscience*.
- 853 Desimone, R., & Schein, S. J. (1987). Visual properties of neurons in area V4 of the  
854 macaque: sensitivity to stimulus form. *Journal of Neurophysiology*, 57(3), 835–  
855 868.
- 856 Desimone, R., Schein, S. J., Moran, J., & Ungerleider, L. G. (1985). Contour, color and  
857 shape analysis beyond the striate cortex. *Vision Research*, 25(3), 441–452.  
858 [http://doi.org/10.1016/0042-6989\(85\)90069-0](http://doi.org/10.1016/0042-6989(85)90069-0)
- 859 Drevets, W. (2002). Functional anatomical correlates of antidepressant drug treatment  
860 assessed using PET measures of regional glucose metabolism. *European*  
861 *Neuropsychopharmacology*, 12(6), 527–544. [http://doi.org/10.1016/S0924-](http://doi.org/10.1016/S0924-977X(02)00102-5)  
862 [977X\(02\)00102-5](http://doi.org/10.1016/S0924-977X(02)00102-5)
- 863 Drevets, W. C., Price, J. L., Simpson, J. R., Todd, R. D., Reich, T., Vannier, M., &  
864 Raichle, M. E. (1997). Subgenual prefrontal cortex abnormalities in mood  
865 disorders.
- 866 Drevets, W. C., Savitz, J., & Trimble, M. (2008). The subgenual anterior cingulate cortex  
867 in mood disorders. *CNS Spectrums*, 13(8), 663–681.
- 868 Dum, R. P., Levinthal, D. J., & Strick, P. L. (2016). Motor, cognitive, and affective areas

- 869 of the cerebral cortex influence the adrenal medulla. *Proceedings of the National*  
870 *Academy of Sciences of the United States of America*, 113(35), 9922–9927.  
871 <http://doi.org/10.1073/pnas.1605044113>
- 872 Essen, D. C., & Zeki, S. M. (1978). The topographic organization of rhesus monkey  
873 prestriate cortex. *The Journal of Physiology*, 277, 193–226.  
874 [http://doi.org/10.1111/\(ISSN\)1469-7793](http://doi.org/10.1111/(ISSN)1469-7793)
- 875 Farah, M. J. (1994). Neuropsychological inference with an interactive brain: A critique of  
876 the “locality” assumption. *Behavioral and Brain Sciences*, 17(1), 43–61.  
877 <http://doi.org/10.1017/S0140525X00033306>
- 878 Forman, S. D., Dougherty, G. G., Casey, B. J., Siegle, G. J., Braver, T. S., Barch, D. M.,  
879 ... & Lorensen, E. (2004). Opiate addicts lack error-dependent activation of rostral  
880 anterior cingulate. *Biological psychiatry*, 55(5), 531-537.
- 881 Freedman, L. J., Insel, T. R., & Smith, Y. (2000). Subcortical projections of area 25  
882 (subgenual cortex) of the macaque monkey. *Journal of Comparative Neurology*,  
883 421(2), 172–188. [http://doi.org/10.1002/\(SICI\)1096-](http://doi.org/10.1002/(SICI)1096-9861(20000529)421:2<172::AID-CNE4>3.0.CO;2-8)  
884 [9861\(20000529\)421:2<172::AID-CNE4>3.0.CO;2-8](http://doi.org/10.1002/(SICI)1096-9861(20000529)421:2<172::AID-CNE4>3.0.CO;2-8)
- 885 George, M. S., Ketter, T. A., Parekh, P. I., Horwitz, B., Herscovitch, P., & Post, R. M.  
886 (2006). Brain activity during transient sadness and happiness in healthy women.  
887 *American Journal of Psychiatry*, 152(3), 341–351.  
888 <http://doi.org/10.1176/ajp.152.3.341>
- 889 Goldstein, R. Z., Tomasi, D., Rajaram, S., Cottone, L. A., Zhang, L., Maloney, T., et al.  
890 (2007). Role of the anterior cingulate and medial orbitofrontal cortex in processing  
891 drug cues in cocaine addiction. *Neuroscience*, 144(4), 1153–1159.  
892 <http://doi.org/10.1016/j.neuroscience.2006.11.024>
- 893 Graybiel, A. M., & Rauch, S. L. (2000). Toward a Neurobiology of Obsessive-  
894 Compulsive Disorder. *Neuron*, 28(2), 343–347. [http://doi.org/10.1016/S0896-](http://doi.org/10.1016/S0896-6273(00)00113-6)  
895 [6273\(00\)00113-6](http://doi.org/10.1016/S0896-6273(00)00113-6)
- 896 Hayden, B., & Gallant, J. (2013). Working Memory and Decision Processes in Visual  
897 Area V4. *Frontiers in Neuroscience*, 7. <http://doi.org/10.3389/fnins.2013.00018>
- 898 Hayden, B. Y., Heilbronner, S. R., Nair, A. C., & Platt, M. L. (2008). Cognitive  
899 influences on risk-seeking by rhesus macaques. *Judgment and Decision Making*,



- 900 3(5), 389–395.
- 901 Hayden, B. Y., Nair, A. C., McCoy, A. N., & Platt, M. L. (2008). Posterior Cingulate  
902 Cortex Mediates Outcome-Contingent Allocation of Behavior. *Neuron*, *60*(1), 19–  
903 25. <http://doi.org/10.1016/j.neuron.2008.09.012>
- 904 Hayden, B. Y., Pearson, J. M., & Platt, M. L. (2009). Fictive reward signals in the  
905 anterior cingulate cortex. *science*, *324*(5929), 948-950.
- 906 Hayden, B. Y., Pearson, J. M., & Platt, M. L. (2011). Neuronal basis of sequential  
907 foraging decisions in a patchy environment. *Nature neuroscience*, *14*(7), 933-939.
- 908 Hayden, B. Y., & Platt, M. L. (2007). Temporal Discounting Predicts Risk Sensitivity in  
909 Rhesus Macaques. *Current Biology*, *17*(1), 49–53.  
910 <http://doi.org/10.1016/j.cub.2006.10.055>
- 911 Hayden, B. Y., & Platt, M. L. (2009). Cingulate cortex. Encyclopaedia of Neuroscience.  
912 <http://doi.org/10.3389/fnhum.2012.00124/abstract>
- 913 Hayden, B. Y., Smith, D. V., & Platt, M. L. (2009). Electrophysiological correlates of  
914 default-mode processing in macaque posterior cingulate cortex. *Proceedings of the*  
915 *National Academy of Sciences of the United States of America*, *106*(14), 5948–  
916 5953. <http://doi.org/10.1073/pnas.0812035106>
- 917 Heilbronner, S. R., & Haber, S. N. (2014). Frontal cortical and subcortical projections  
918 provide a basis for segmenting the cingulum bundle: implications for  
919 neuroimaging and psychiatric disorders. *The Journal of Neuroscience*, *34*(30),  
920 10041-10054.
- 921 Heilbronner, S. R., & Hayden, B. (2015). Contextual factors explain risk-seeking  
922 preferences in rhesus monkeys. *Decision Making under Uncertainty*, 91.
- 923 Heilbronner, S. R., & Hayden, B. Y. (2016). Dorsal Anterior Cingulate Cortex: A  
924 Bottom-Up View. *Annual Review of Neuroscience*.
- 925 Heilbronner, S. R., & Platt, M. L. (2013). Causal Evidence of Performance Monitoring  
926 by Neurons in Posterior Cingulate Cortex during Learning. *Neuron*, *80*(6), 1384–  
927 1391. <http://doi.org/10.1016/j.neuron.2013.09.028>
- 928 Hillman, K. L., & Bilkey, D. K. (2013). Persisting through subjective effort: A key role  
929 for the anterior cingulate cortex? *Behavioral and Brain Sciences*, *36*(6), 691–692.  
930 <http://doi.org/10.1017/S0140525X13001039>

- 931 Hosokawa, T., Kennerley, S. W., Sloan, J., & Wallis, J. D. (2013). Single-neuron  
932 mechanisms underlying cost-benefit analysis in frontal cortex. *The Journal of*  
933 *Neuroscience*, 33(44), 17385–17397. [http://doi.org/10.1523/JNEUROSCI.2221-](http://doi.org/10.1523/JNEUROSCI.2221-13.2013)  
934 [13.2013](http://doi.org/10.1523/JNEUROSCI.2221-13.2013)
- 935 Hunt, L. T., Behrens, T. E., Hosokawa, T., Wallis, J. D., & Kennerley, S. W. (2015).  
936 Capturing the temporal evolution of choice across prefrontal cortex. *Elife*, 4,  
937 e11945.
- 938 Johansen-Berg, H., Gutman, D. A., Behrens, T. E. J., Matthews, P. M., Rushworth, M. F.  
939 S., Katz, E., et al. (2008). Anatomical Connectivity of the Subgenual Cingulate  
940 Region Targeted with Deep Brain Stimulation for Treatment-Resistant Depression.  
941 *Cerebral Cortex*, 18(6), 1374–1383. <http://doi.org/10.1093/cercor/bhm167>
- 942 Kennerley, S. W., Walton, M. E., Behrens, T. E. J., Buckley, M. J., & Rushworth, M. F.  
943 S. (2006). Optimal decision making and the anterior cingulate cortex. *Nature*  
944 *Neuroscience*, 9(7), 940–947. <http://doi.org/10.1038/nm1724>
- 945 Kerns, J. G., Cohen, J. D., MacDonald, A. W., Cho, R. Y., Stenger, V. A., & Carter, C. S.  
946 (2004). Anterior Cingulate Conflict Monitoring and Adjustments in Control.  
947 *Science*, 303(5660), 1023–1026. <http://doi.org/10.1126/science.1089910>
- 948 Lak, A., Stauffer, W. R., & Schultz, W. (2014). Dopamine prediction error responses  
949 integrate subjective value from different reward dimensions. *Proceedings of the*  
950 *National Academy of Sciences of the United States of America*, 111(6), 2343–2348.  
951 <http://doi.org/10.1073/pnas.1321596111>
- 952 Lennie, P. (1998). Single Units and Visual Cortical Organization. *Perception*, 27(8),  
953 889–935. <http://doi.org/10.1068/p270889>
- 954 Mayberg, H. S., Brannan, S. K., Mahurin, R. K., Jerabek, P. A., Brickman, J. S., Tekell,  
955 J. L., et al. (1997). Cingulate function in depression: a potential predictor of  
956 treatment response. *NeuroReport*, 8(4), 1057.
- 957 Mayberg, H. S., Brannan, S. K., Tekell, J. L., Silva, J. A., Mahurin, R. K., McGinnis, S.,  
958 & Jerabek, P. A. (2000). Regional metabolic effects of fluoxetine in major  
959 depression: serial changes and relationship to clinical response. *Biological*  
960 *Psychiatry*, 48(8), 830–843. [http://doi.org/10.1016/S0006-3223\(00\)01036-2](http://doi.org/10.1016/S0006-3223(00)01036-2)
- 961 Mayberg, H. S., Liotti, M., & Brannan, S. K. (1999). Reciprocal limbic-cortical function

- 962 and negative mood: converging PET findings in depression and normal sadness.  
963 *American Journal of ...*
- 964 Mayberg, H. S., Lozano, A. M., Voon, V., McNeely, H. E., Seminowicz, D., Hamani, C.,  
965 et al. (2005). Deep Brain Stimulation for Treatment-Resistant Depression. *Neuron*,  
966 45(5), 651–660. <http://doi.org/10.1016/j.neuron.2005.02.014>
- 967 McClelland, J. L., Rumelhart, D. E., & Hinton, G. E. (1986). The appeal of parallel  
968 distributed processing. *MIT Press, Cambridge MA*, 3-44.
- 969 McCoy, A. N., Crowley, J. C., Haghigian, G., Dean, H. L., & Platt, M. L. (2003).  
970 Saccade Reward Signals in Posterior Cingulate Cortex. *Neuron*, 40(5), 1031–1040.  
971 [http://doi.org/10.1016/S0896-6273\(03\)00719-0](http://doi.org/10.1016/S0896-6273(03)00719-0)
- 972 McCoy, A. N., & Platt, M. L. (2005). Risk-sensitive neurons in macaque posterior  
973 cingulate cortex. *Nature neuroscience*, 8(9), 1220-1227.
- 974 Mirabella, G., Bertini, G., Samengo, I., Kilavik, B. E., Frilli, D., Libera, Della, C., &  
975 Chelazzi, L. (2007). Neurons in Area V4 of the Macaque Translate Attended  
976 Visual Features into Behaviorally Relevant Categories. *Neuron*, 54(2), 303–318.  
977 <http://doi.org/10.1016/j.neuron.2007.04.007>
- 978 Monosov, I. E., & Hikosaka, O. (2012). Regionally distinct processing of rewards and  
979 punishments by the primate ventromedial prefrontal cortex. *The Journal of*  
980 *Neuroscience*, 32(30), 10318–10330. [http://doi.org/10.1523/JNEUROSCI.1801-](http://doi.org/10.1523/JNEUROSCI.1801-12.2012)  
981 12.2012
- 982 Motter, B. C. (1994). Neural correlates of attentive selection for color or luminance in  
983 extrastriate area V4. *Journal of Neuroscience* 14, 2178–2189.
- 984 Neubert, F.-X., Mars, R. B., Sallet, J., & Rushworth, M. F. S. (2015). Connectivity  
985 reveals relationship of brain areas for reward-guided learning and decision making  
986 in human and monkey frontal cortex. *Proceedings of the National Academy of*  
987 *Sciences*, 112(20), E2695–E2704. <http://doi.org/10.1073/pnas.1410767112>
- 988 Öngür, D., Drevets, W. C., & Price, J. L. (1998). Glial reduction in the subgenual  
989 prefrontal cortex in mood disorders. *Proceedings of the National Academy of*  
990 *Sciences*, 95(22), 13290–13295. <http://doi.org/10.1073/pnas.95.22.13290>
- 991 Paus, T. (2001). Primate Anterior Cingulate Cortex: Where Motor Control, Drive and  
992 Cognition Interface. *Nature Reviews Neuroscience*, 1–8.

- 993 Picton, T. W., Stuss, D. T., Alexander, M. P., Shallice, T., Binns, M. A., & Gillingham,  
994 S. (2007). Effects of focal frontal lesions on response inhibition. *Cerebral Cortex*,  
995 *17*(4), 826-838.
- 996 Procyk, E., Tanaka, Y. L., & Joseph, J. P. (2000). Anterior cingulate activity during  
997 routine and non-routine sequential behaviors in macaques. *Nature Neuroscience*,  
998 *3*(5), 502–508. <http://doi.org/10.1038/74880>
- 999 Quilodran, R., Rothé, M., & Procyk, E. (2008). Behavioral Shifts and Action Valuation in  
1000 the Anterior Cingulate Cortex. *Neuron*, *57*(2), 314–325.  
1001 <http://doi.org/10.1016/j.neuron.2007.11.031>
- 1002 Rangel, A., & Hare, T. (2010). Neural computations associated with goal-directed choice.  
1003 *Current Opinion in Neurobiology*, *20*(2), 262–270.  
1004 <http://doi.org/10.1016/j.conb.2010.03.001>
- 1005 Rich, E. L., & Wallis, J. D. (2016). Decoding subjective decisions from orbitofrontal  
1006 cortex. *Nature Neuroscience*, *19*(7), 973–980. <http://doi.org/10.1038/nn.4320>
- 1007 Rolls, E. T., Inoue, K., & Browning, A. (2003). Activity of primate subgenual cingulate  
1008 cortex neurons is related to sleep. *Journal of Neurophysiology*, *90*(1), 134-142.
- 1009 Rudebeck, P. H., Putnam, P. T., Daniels, T. E., Yang, T., Mitz, A. R., Rhodes, S. E., &  
1010 Murray, E. A. (2014). A role for primate subgenual cingulate cortex in sustaining  
1011 autonomic arousal. *Proceedings of the National Academy of Sciences*, *111*(14),  
1012 5391-5396.
- 1013 Rushworth, M. F. S., Hadland, K. A., Paus, T., & Sipila, P. K. (2002). Role of the Human  
1014 Medial Frontal Cortex in Task Switching: A Combined fMRI and TMS Study.  
1015 *Journal of Neurophysiology*, *87*(5), 2577–2592. [http://doi.org/10.1016/S0028-](http://doi.org/10.1016/S0028-3932(97)00003-1)  
1016 [3932\(97\)00003-1](http://doi.org/10.1016/S0028-3932(97)00003-1)
- 1017 Rushworth, M. F., Kolling, N., Sallet, J., & Mars, R. B. (2012). Valuation and decision-  
1018 making in frontal cortex: one or many serial or parallel systems? *Current Opinion*  
1019 *in Neurobiology*, *22*(6), 946–955. <http://doi.org/10.1016/j.conb.2012.04.011>
- 1020 Schein, S. J., Marrocco, R. T., & De Monasterio, F. M. (1982). Is there a high  
1021 concentration of color-selective cells in area V4 of monkey visual cortex? *Journal*  
1022 *of Neurophysiology*, *47*(2), 193–213. <http://doi.org/10.1152/jn.00847.2015>
- 1023 Seo, H., & Lee, D. (2007). Temporal filtering of reward signals in the dorsal anterior

- 1024           cingulate cortex during a mixed-strategy game. *The Journal of Neuroscience*.
- 1025   Shenhav, A., Botvinick, M. M., & Cohen, J. D. (2013). The Expected Value of Control:  
1026           An Integrative Theory of Anterior Cingulate Cortex Function. *Neuron*, 79(2), 217–  
1027           240. <http://doi.org/10.1016/j.neuron.2013.07.007>
- 1028   Shidara, M., & Richmond, B. J. (2002). Anterior Cingulate: Single Neuronal Signals  
1029           Related to Degree of Reward Expectancy. *Science*, 296(5573), 1709–1711.  
1030           <http://doi.org/10.1126/science.1069504>
- 1031   Strait, C. E., Blanchard, T. C., & Hayden, B. Y. (2014). Reward Value Comparison via  
1032           Mutual Inhibition in Ventromedial Prefrontal Cortex. *Neuron*, 82(6), 1357–1366.  
1033           <http://doi.org/10.1016/j.neuron.2014.04.032>
- 1034   Strait, C. E., Slezzer, B. J., Blanchard, T. C., Azab, H., Castagno, M. D., & Hayden, B.  
1035           Y. (2016). Neuronal selectivity for spatial positions of offers and choices in five  
1036           reward regions. *Journal of neurophysiology*, 115(3), 1098-1111.
- 1037   Strait, C. E., Slezzer, B. J., & Hayden, B. Y. (2015). Signatures of Value Comparison in  
1038           Ventral Striatum Neurons. *PLoS Biol*, 13(6), e1002173.  
1039           <http://doi.org/10.1371/journal.pbio.1002173>
- 1040   Van Essen, D. C., & Maunsell, J. H. R. (1983). Hierarchical organization and functional  
1041           streams in the visual cortex. *Trends in Neurosciences*, 6, 370–375.  
1042           [http://doi.org/10.1016/0166-2236\(83\)90167-4](http://doi.org/10.1016/0166-2236(83)90167-4)
- 1043   Vogt, B. A., Finch, D. M., & Olson, C. R. (1992). Functional Heterogeneity in Cingulate  
1044           Cortex: The Anterior Executive and Posterior Evaluative Regions. *Cerebral*  
1045           *Cortex*, 2(6), 435–443. <http://doi.org/10.1093/cercor/2.6.435-a>
- 1046   Vogt, B. A., Nimchinsky, E. A., Vogt, L. J., & Hof, P. R. (1995). Human cingulate  
1047           cortex: Surface features, flat maps, and cytoarchitecture. *Journal of Comparative*  
1048           *Neurology*, 359(3), 490–506. <http://doi.org/10.1002/cne.903590310>
- 1049   Wallis, J. D., & Kennerley, S. W. (2010). Heterogeneous reward signals in prefrontal  
1050           cortex. *Current Opinion in Neurobiology*, 20(2), 191–198.  
1051           <http://doi.org/10.1016/j.conb.2010.02.009>
- 1052   Yamada, H., Tymula, A., Louie, K., & Glimcher, P. W. (2013). Thirst-dependent risk  
1053           preferences in monkeys identify a primitive form of wealth. *Proceedings of the*  
1054           *National Academy of Sciences of the United States of America*, 110(39), 15788–

- 1055            15793. <http://doi.org/10.1073/pnas.1308718110>
- 1056    Zeki, S. M. (1977). Colour Coding in the Superior Temporal Sulcus of Rhesus Monkey
- 1057            Visual Cortex. *Proceedings of the Royal Society B: Biological Sciences*,
- 1058            197(1127), 195–223. <http://doi.org/10.1098/rspb.1977.0065>
- 1059    Zeki, S. M. (1978). Functional specialisation in the visual cortex of the rhesus monkey.
- 1060            *Nature*, 274(5670), 423-428.
- 1061    Zeki, S. (1980). The representation of colours. *Nature*, 284, 413.
- 1062
